# Supplementary material for: Simultaneous removal of heavy metal ions by a sulfonic acid-functionalized melamine-based covalent organic framework: optimization by response surface methodology
Source: Royal Society of Chemistry journal article supplement (doi:10.1039/d3nj04303g), 2023-01-01
Supplement: d3nj04303g1.pdf [file d3nj04303g1.pdf]

**Electronic supplementary material**

**Simultaneous removal of heavy metal ions by sulfonic acid-functionalized melamine-based covalent organic framework: Optimization by surface response methodology**

Asiyeh Salami <sup>□</sup><sup>a</sup>, Arash Larki <sup>a\*</sup>, Seyyed Jafar Saghanezhad <sup>b</sup>

<sup>a</sup> *Department of Marine Chemistry, Faculty of Marine Science, Khorramshahr University of Marine Science and Technology, Khorramshahr, Iran*

<sup>b</sup> *ACECR-Production Technology Research Institute, Ahvaz, Iran*

**\*Corresponding author:**

**Arash Larki, E-mail:** arash\_larki@yahoo.com & a.larki@kmsu.ac.ir

**Contents:**

- S1. Adsorption study (Pages S2-S3);
- S2. Additional 6 tables (Pages S4 & S9);
- S3. Additional 16 figures (Pages S11-S22);
- References (Page S23);

## **S1. Adsorption study**

### *Adsorption isotherms*

In the Langmuir model, it is assumed that the adsorption is monolayer and occurs at a homogeneous surface, without interaction between the adsorbed materials [1]. The linearity of the Langmuir model is described by the equation (1) as follows:

$$\frac{C_e}{q_e} = \frac{1}{K_L q_{max}} + \frac{C_e}{q_{max}} \quad (1)$$

where,  $C_e$  ( $\text{mg L}^{-1}$ ) and  $q_e$  ( $\text{mg g}^{-1}$ ) are heavy metal ions concentration and quantity of desired ions adsorbed onto the adsorbent surface at equilibrium,  $q_{max}$  ( $\text{mg g}^{-1}$ ) is the maximum adsorption capacity and  $K_L$  ( $\text{mL mg}^{-1}$ ) is the Langmuir adsorption equilibrium constant.  $q_{max}$  and  $K_L$  could be calculated with a straight line drawn from  $C_e/q_e$  versus  $C_e$ .

The Freundlich isotherm is not accept the capacity of one layer and is based on the assumption of adsorption on heterogeneous surfaces, due to the increase in the amount of analyte adsorbed in the solution [2]. This model is linear by the equation (2) as follows:

$$\log q_e = \log k_f + \left(\frac{1}{n}\right) \log C_e \quad (2)$$

where,  $n$  and  $K_F$  ( $\text{mg g}^{-1} (\text{L mg}^{-1})^{1/n}$ ) are Freundlich constants, which are related to the heterogeneity factor and adsorption capacity, respectively. These constants can be calculated by plotting of  $\log q_e$  versus  $\log C_e$ . The  $n$  value should be in the range 1 to 10 for favorable adsorption process.

The Temkin isotherm model contains a parameter which considers the adsorbent-adsorbate interactions and assumes that the adsorption heat declines linearly with the surface covered between the adsorbates and adsorbent [3]. The linearity of Temkin model is given by equation (3):

$$q_e = B \ln K_T + \left( \frac{RT}{b} \right) \ln C_e \quad (3)$$

where,  $B=RT/b_T$ ,  $b_T$  (J mol<sup>-1</sup>) is the constant of Temkin that is related to the heat of adsorption,  $K_T$  (L g<sup>-1</sup>) is the equilibrium binding constant,  $R$  and  $T$  are the gas constant (8.3145 J mol<sup>-1</sup> K<sup>-1</sup>) and absolute temperature in Kelvin, respectively. The  $B$  and  $K_T$  values can be calculated from slope and intercept of a graph between  $q_e$  and  $\ln C_e$ .

The Dubinin-Radushkevich (D-R) model isotherm can be distinguished between physical and chemical adsorption of metal ions. The D-R model is often used to estimate the characteristic porosity and the apparent free energy of adsorption [4]. The Dubinin-Radushkevich adsorption isotherm is represented as equation (4):

$$\ln q_e = \ln q_m - \beta \varepsilon^2 \quad (4)$$

where  $\beta$  (mol<sup>2</sup>/kJ<sup>2</sup>) is a constant related to the mean free energy change,  $\varepsilon$  is the polanyi potential and could be determined by equation (5). The mean free energy (kJ mol<sup>-1</sup>) could be calculated using equation (6):

$$\varepsilon = RT \ln \left( 1 + \frac{1}{C_e} \right) \quad (5)$$

$$E = \frac{1}{\sqrt{2\beta}} \quad (6)$$

The Khan isotherm model is a general model for adsorption of adsorbate from pure dilute equations solutions. This model has been used to describe the experimental data with the minimum average percentage error for the adsorption of some pollutants from aqueous solutions by comparing several multicomponent adsorption isotherms [5]. This isotherm model is expressed as equation (7):

$$q_e = \frac{q_m b_k C_e}{(1 + b_k C_e)^{a_K}} \quad (7)$$

where  $b_k$  is the Khan isotherm constant (L mg<sup>-1</sup>) and  $a_K$  is the Khan isotherm model exponent.

The Langmuir isotherm diagram for Cd(II), Cu(II), Pb(II), Ni(II) and Zn(II) ions by COF@SO<sub>3</sub>H (at 25 °C with pH of 5.5) is shown in Fig. S5 to S9, respectively.

### ***Adsorption kinetics***

The pseudo-first-order model was shown in equation (8):

$$\ln (q_e - q_t) = \ln q_e - K_1 t \quad (8)$$

where  $q_e$  and  $q_t$  (mg g<sup>-1</sup>) were the amount of adsorbed ions at equilibrium and at time  $t$ ;  $k_1$  (min<sup>-1</sup>) was the rate constant of the pseudo-first-order model. Through drawing the plot of  $\ln(q_e - q_t)$  vs.  $t$ ,  $q_e$  and  $k_1$  were calculated as the slope and intercept.

In addition, equation (9) gave a model of the pseudo-second-order:

$$\frac{t}{q_t} = \frac{1}{k_2 q_e^2} + \frac{1}{q_e} \quad (9)$$

where,  $k_2$  (g mg<sup>-1</sup> min<sup>-1</sup>) was the rate constant of pseudo-second-order adsorption [6, 7]. From the slope and intercept of the plots  $t/q_t$  vs.  $t$ , the pseudo-second-order rate constant  $k_2$  and  $q_e$  values were acquired.

To identify the diffusion mechanism in the adsorption, intraparticle mass transfer diffusion model has been proposed by Weber and Morris [8]. The equation (10) may be written as follows:

$$q_t = K_{dif} t^{1/2} + C \quad (10)$$

where  $k_{dif}$  is the intraparticle diffusion constant (g g<sup>-1</sup> min<sup>-1/2</sup>) and C (g g<sup>-1</sup>) a constant related with diffusion resistance.

The Kinetic model for Cd(II), Cu(II), Pb(II), Ni(II) and Zn(II) ions adsorption onto the COF@SO<sub>3</sub>H adsorbent using pseudo-2<sup>nd</sup>-order are shown in Fig. S10 to S14, respectively.

**Table S1.** Experimental results of adsorption tests in removal of target ions under BBD.

| Run | Factor 1<br>A<br>pH | Factor 2<br>B<br>Ads.<br>Dos.<br>(mg) | Factor 3<br>C<br>Inicial<br>Conc.<br>(mg/L) | Factor 4<br>D<br>time<br>(min) | Response 1<br>Cd<br>Removal<br>(%) | Response 2<br>Pb<br>Removal<br>(%) | Response 3<br>Cu<br>Removal<br>(%) | Response 4<br>Zn<br>Removal<br>(%) | Response 5<br>Ni<br>Removal<br>(%) |
|-----|---------------------|---------------------------------------|---------------------------------------------|--------------------------------|------------------------------------|------------------------------------|------------------------------------|------------------------------------|------------------------------------|
| 1   | 7                   | 25                                    | 3                                           | 20                             | 64                                 | 58                                 | 66.9                               | 66                                 | 68                                 |
| 2   | 7                   | 25                                    | 1                                           | 40                             | 63.9                               | 62                                 | 65                                 | 63.1                               | 63.7                               |
| 3   | 5.5                 | 10                                    | 1                                           | 40                             | 79.5                               | 78                                 | 80.3                               | 80.1                               | 79.6                               |
| 4   | 4                   | 25                                    | 1                                           | 40                             | 97.3                               | 98.1                               | 95.9                               | 99.6                               | 98                                 |
| 5   | 5.5                 | 10                                    | 3                                           | 60                             | 65.9                               | 68                                 | 64                                 | 66                                 | 65.7                               |
| 6   | 7                   | 25                                    | 3                                           | 60                             | 60.4                               | 60.7                               | 68.1                               | 62.7                               | 63.2                               |
| 7   | 5.5                 | 25                                    | 5                                           | 60                             | 92                                 | 90.29                              | 90.88                              | 92.6                               | 91.9                               |
| 8   | 5.5                 | 25                                    | 3                                           | 40                             | 96.6                               | 96.1                               | 90.6                               | 98.4                               | 97.5                               |
| 9   | 5.5                 | 40                                    | 5                                           | 40                             | 91.44                              | 92.06                              | 92.17                              | 93                                 | 92.5                               |
| 10  | 5.5                 | 40                                    | 3                                           | 20                             | 86.2                               | 80.7                               | 84.5                               | 80.4                               | 80                                 |
| 11  | 5.5                 | 40                                    | 1                                           | 40                             | 99.7                               | 99.8                               | 98.3                               | 98                                 | 97.9                               |
| 12  | 5.5                 | 10                                    | 3                                           | 20                             | 59.9                               | 58.5                               | 56.8                               | 56.6                               | 56.7                               |
| 13  | 5.5                 | 25                                    | 3                                           | 40                             | 97.8                               | 94.3                               | 89                                 | 95                                 | 98                                 |
| 14  | 5.5                 | 25                                    | 1                                           | 20                             | 94.9                               | 95.1                               | 94.3                               | 94                                 | 93.9                               |
| 15  | 7                   | 40                                    | 3                                           | 40                             | 59.8                               | 58                                 | 66.2                               | 64                                 | 65                                 |
| 16  | 5.5                 | 40                                    | 3                                           | 60                             | 99.5                               | 99.8                               | 98.3                               | 98                                 | 97.6                               |
| 17  | 4                   | 10                                    | 3                                           | 40                             | 50.24                              | 49.3                               | 49                                 | 51                                 | 52.5                               |
| 18  | 5.5                 | 25                                    | 5                                           | 20                             | 76.4                               | 75.3                               | 75.9                               | 77.6                               | 77                                 |
| 19  | 7                   | 10                                    | 3                                           | 40                             | 35.3                               | 34                                 | 34.5                               | 37                                 | 33                                 |
| 20  | 5.5                 | 25                                    | 3                                           | 40                             | 94.4                               | 92.3                               | 88                                 | 92.5                               | 93.3                               |
| 21  | 5.5                 | 10                                    | 5                                           | 40                             | 45.1                               | 47.6                               | 44.8                               | 45.8                               | 45                                 |
| 22  | 5.5                 | 25                                    | 1                                           | 60                             | 99.9                               | 99.9                               | 99.9                               | 98.9                               | 98.5                               |
| 23  | 4                   | 25                                    | 5                                           | 40                             | 60.2                               | 58.5                               | 59.9                               | 60.5                               | 60                                 |
| 24  | 5.5                 | 25                                    | 3                                           | 40                             | 94                                 | 92.9                               | 91                                 | 97.5                               | 97.1                               |
| 25  | 5.5                 | 25                                    | 3                                           | 40                             | 93.5                               | 90.7                               | 87                                 | 92                                 | 94.2                               |
| 26  | 4                   | 40                                    | 3                                           | 40                             | 86.7                               | 80                                 | 85.3                               | 81.7                               | 82                                 |
| 27  | 4                   | 25                                    | 3                                           | 20                             | 70.3                               | 69.9                               | 71.5                               | 69.4                               | 70                                 |
| 28  | 7                   | 25                                    | 5                                           | 40                             | 55.2                               | 47.9                               | 56.1                               | 59                                 | 62.1                               |
| 29  | 4                   | 25                                    | 3                                           | 60                             | 88                                 | 86                                 | 85                                 | 87.5                               | 81                                 |

**Table S2.** ANOVA results for Cd(II) ion removal.

| Source           | Sum of Squares | df | Mean Square | F-value | p-value  |                 |
|------------------|----------------|----|-------------|---------|----------|-----------------|
| <b>Model</b>     | 10084.98       | 10 | 1008.50     | 93.07   | < 0.0001 | significant     |
| A-pH             | 1085.66        | 1  | 1085.66     | 100.19  | < 0.0001 |                 |
| B-Ads. Dos.      | 2926.56        | 1  | 2926.56     | 270.08  | < 0.0001 |                 |
| C-Inicial Conc.  | 1099.40        | 1  | 1099.40     | 101.46  | < 0.0001 |                 |
| D-time           | 243.00         | 1  | 243.00      | 22.43   | 0.0002   |                 |
| AB               | 35.76          | 1  | 35.76       | 3.30    | 0.0860   |                 |
| AC               | 201.64         | 1  | 201.64      | 18.61   | 0.0004   |                 |
| AD               | 113.42         | 1  | 113.42      | 10.47   | 0.0046   |                 |
| BC               | 170.82         | 1  | 170.82      | 15.76   | 0.0009   |                 |
| A <sup>2</sup>   | 3406.98        | 1  | 3406.98     | 314.42  | < 0.0001 |                 |
| B <sup>2</sup>   | 1300.19        | 1  | 1300.19     | 119.99  | < 0.0001 |                 |
| <b>Residual</b>  | 195.05         | 18 | 10.84       |         |          |                 |
| Lack of Fit      | 181.37         | 14 | 12.96       | 3.79    | 0.1037   | not significant |
| Pure Error       | 13.67          | 4  | 3.42        |         |          |                 |
| <b>Cor Total</b> | 10280.02       | 28 |             |         |          |                 |

**Table S3.** ANOVA results for Cu(II) ion removal.

| Source           | Sum of Squares | df | Mean Square | F-value | p-value                |
|------------------|----------------|----|-------------|---------|------------------------|
| <b>Model</b>     | 8685.45        | 9  | 965.05      | 103.14  | < 0.0001 significant   |
| A-pH             | 672.00         | 1  | 672.00      | 71.82   | < 0.0001               |
| B-Ads. Dos.      | 3180.79        | 1  | 3180.79     | 339.96  | < 0.0001               |
| C-Inicial Conc.  | 1082.05        | 1  | 1082.05     | 115.65  | < 0.0001               |
| D-time           | 263.95         | 1  | 263.95      | 28.21   | < 0.0001               |
| AC               | 183.60         | 1  | 183.60      | 19.62   | 0.0003                 |
| AD               | 37.82          | 1  | 37.82       | 4.04    | 0.0588                 |
| BC               | 215.65         | 1  | 215.65      | 23.05   | 0.0001                 |
| A <sup>2</sup>   | 2387.66        | 1  | 2387.66     | 255.19  | < 0.0001               |
| B <sup>2</sup>   | 1036.27        | 1  | 1036.27     | 110.76  | < 0.0001               |
| <b>Residual</b>  | 177.77         | 19 | 9.36        |         |                        |
| Lack of Fit      | 166.28         | 15 | 11.09       | 3.86    | 0.1004 not significant |
| Pure Error       | 11.49          | 4  | 2.87        |         |                        |
| <b>Cor Total</b> | 8863.22        | 28 |             |         |                        |

**Table S4.** ANOVA results for Pb(II) ion removal.

| Source           | Sum of Squares | df | Mean Square | F-value | p-value                |
|------------------|----------------|----|-------------|---------|------------------------|
| <b>Model</b>     | 10276.96       | 9  | 1141.88     | 85.78   | < 0.0001 significant   |
| A-pH             | 1224.12        | 1  | 1224.12     | 91.96   | < 0.0001               |
| B-Ads. Dos.      | 2550.92        | 1  | 2550.92     | 191.62  | < 0.0001               |
| C-Inicial Conc.  | 1225.13        | 1  | 1225.13     | 92.03   | < 0.0001               |
| D-time           | 376.21         | 1  | 376.21      | 28.26   | < 0.0001               |
| AC               | 162.56         | 1  | 162.56      | 12.21   | 0.0024                 |
| AD               | 44.89          | 1  | 44.89       | 3.37    | 0.0820                 |
| BC               | 128.37         | 1  | 128.37      | 9.64    | 0.0058                 |
| A <sup>2</sup>   | 3862.72        | 1  | 3862.72     | 290.17  | < 0.0001               |
| B <sup>2</sup>   | 1209.36        | 1  | 1209.36     | 90.85   | < 0.0001               |
| <b>Residual</b>  | 252.93         | 19 | 13.31       |         |                        |
| Lack of Fit      | 236.18         | 15 | 15.75       | 3.76    | 0.1048 not significant |
| Pure Error       | 16.75          | 4  | 4.19        |         |                        |
| <b>Cor Total</b> | 10529.89       | 28 |             |         |                        |



**Table S5.** ANOVA results for Ni(II) removal.

| Source           | Sum of Squares | df | Mean Square | F-value | p-value                |
|------------------|----------------|----|-------------|---------|------------------------|
| <b>Model</b>     | 8982.62        | 10 | 898.26      | 63.32   | < 0.0001 significant   |
| A-pH             | 652.69         | 1  | 652.69      | 46.01   | < 0.0001               |
| B-Ads. Dos.      | 2369.50        | 1  | 2369.50     | 167.03  | < 0.0001               |
| C-Inicial Conc.  | 885.80         | 1  | 885.80      | 62.44   | < 0.0001               |
| D-time           | 174.47         | 1  | 174.47      | 12.30   | 0.0027                 |
| AC               | 331.24         | 1  | 331.24      | 23.35   | 0.0002                 |
| AD               | 62.41          | 1  | 62.41       | 4.40    | 0.0512                 |
| BC               | 213.16         | 1  | 213.16      | 15.03   | 0.0012                 |
| A <sup>2</sup>   | 3117.98        | 1  | 3117.98     | 219.79  | < 0.0001               |
| B <sup>2</sup>   | 1591.20        | 1  | 1591.20     | 112.16  | < 0.0001               |
| D <sup>2</sup>   | 99.52          | 1  | 99.52       | 7.01    | 0.0169                 |
| <b>Residual</b>  | 241.17         | 17 | 14.19       |         |                        |
| Lack of Fit      | 223.18         | 13 | 17.17       | 3.82    | 0.1029 not significant |
| Pure Error       | 17.99          | 4  | 4.50        |         |                        |
| <b>Cor Total</b> | 9223.79        | 27 |             |         |                        |

**Table S6.** ANOVA results for Zn(II) ion removal.

| Source           | Sum of Squares | df | Mean Square | F-value | p-value                |
|------------------|----------------|----|-------------|---------|------------------------|
| <b>Model</b>     | 9367.92        | 10 | 936.79      | 76.28   | < 0.0001 significant   |
| A-pH             | 798.70         | 1  | 798.70      | 65.03   | < 0.0001               |
| B-Ads. Dos.      | 2658.16        | 1  | 2658.16     | 216.43  | < 0.0001               |
| C-Inicial Conc.  | 922.25         | 1  | 922.25      | 75.09   | < 0.0001               |
| D-time           | 317.24         | 1  | 317.24      | 25.83   | < 0.0001               |
| AC               | 306.25         | 1  | 306.25      | 24.94   | < 0.0001               |
| AD               | 114.49         | 1  | 114.49      | 9.32    | 0.0068                 |
| BC               | 214.62         | 1  | 214.62      | 17.47   | 0.0006                 |
| A <sup>2</sup>   | 3061.49        | 1  | 3061.49     | 249.27  | < 0.0001               |
| B <sup>2</sup>   | 1527.85        | 1  | 1527.85     | 124.40  | < 0.0001               |
| D <sup>2</sup>   | 53.03          | 1  | 53.03       | 4.32    | 0.0523                 |
| <b>Residual</b>  | 221.07         | 18 | 12.28       |         |                        |
| Lack of Fit      | 188.04         | 14 | 13.43       | 1.63    | 0.3409 not significant |
| Pure Error       | 33.03          | 4  | 8.26        |         |                        |
| <b>Cor Total</b> | 9588.99        | 28 |             |         |                        |

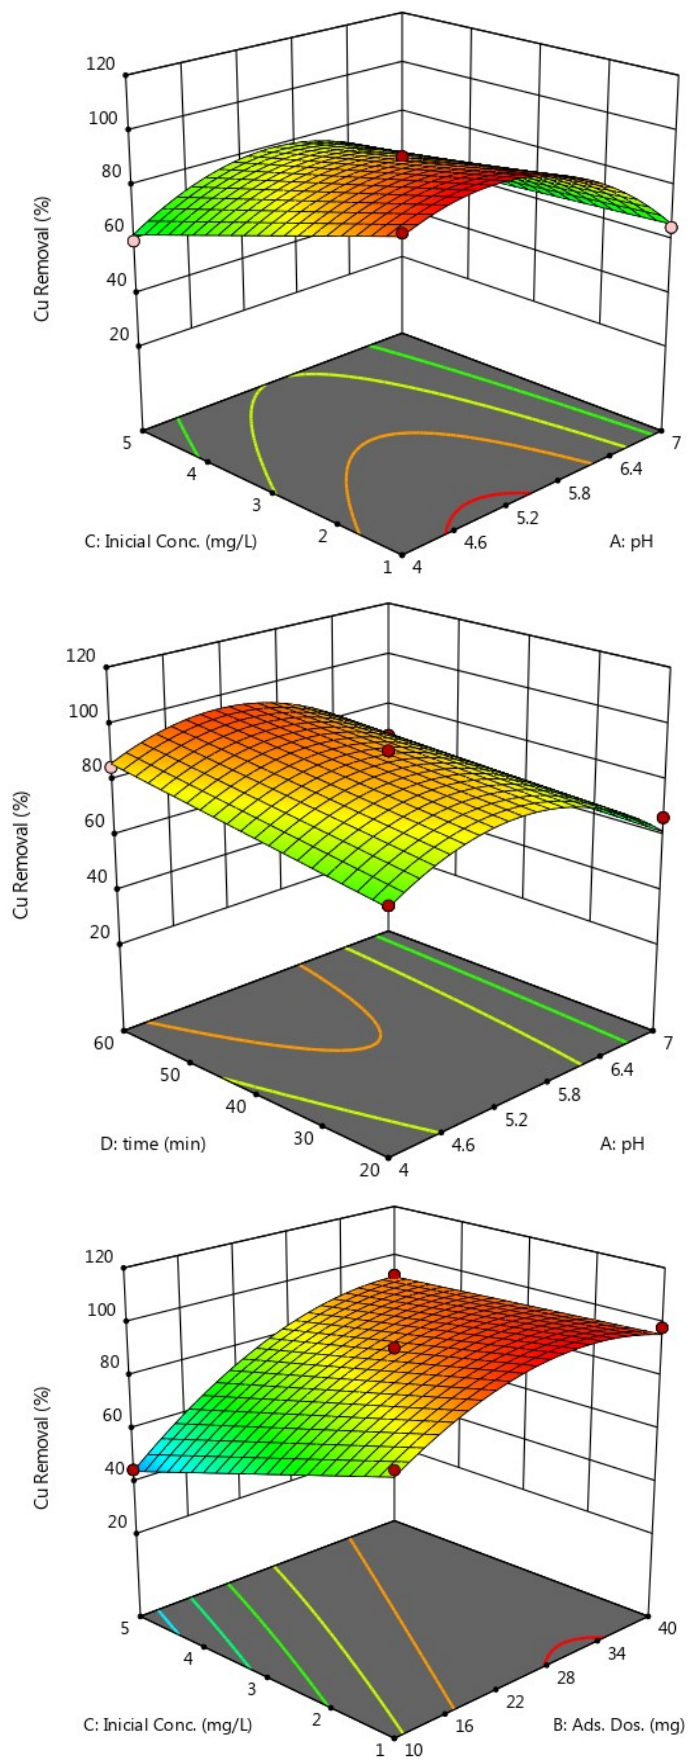

**Fig. S1.** 3D response surface plots of Cu(II) adsorption on COF@SO<sub>3</sub>H adsorbent.

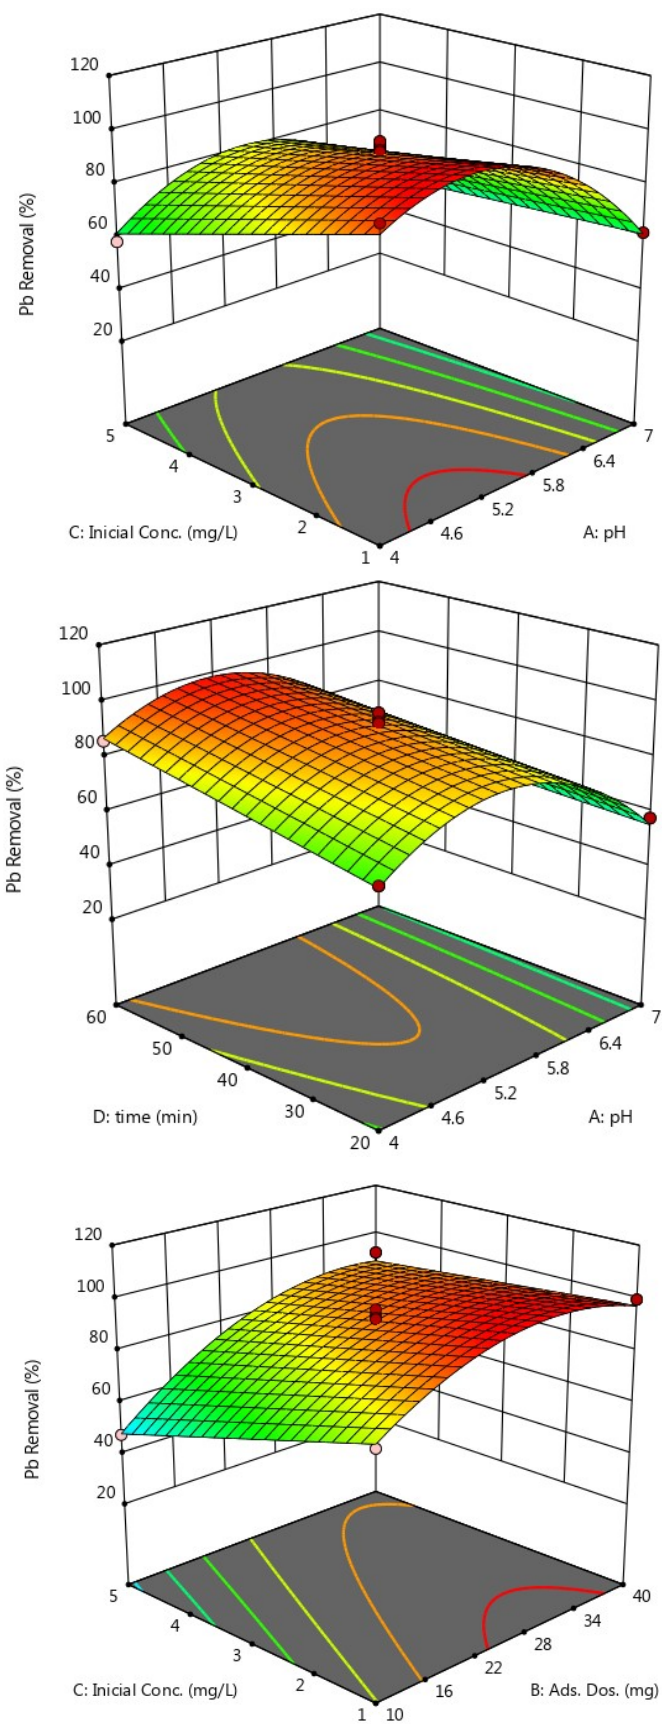

**Fig. S2.** 3D response surface plots of Pb(II) adsorption on COF@SO<sub>3</sub>H adsorbent.

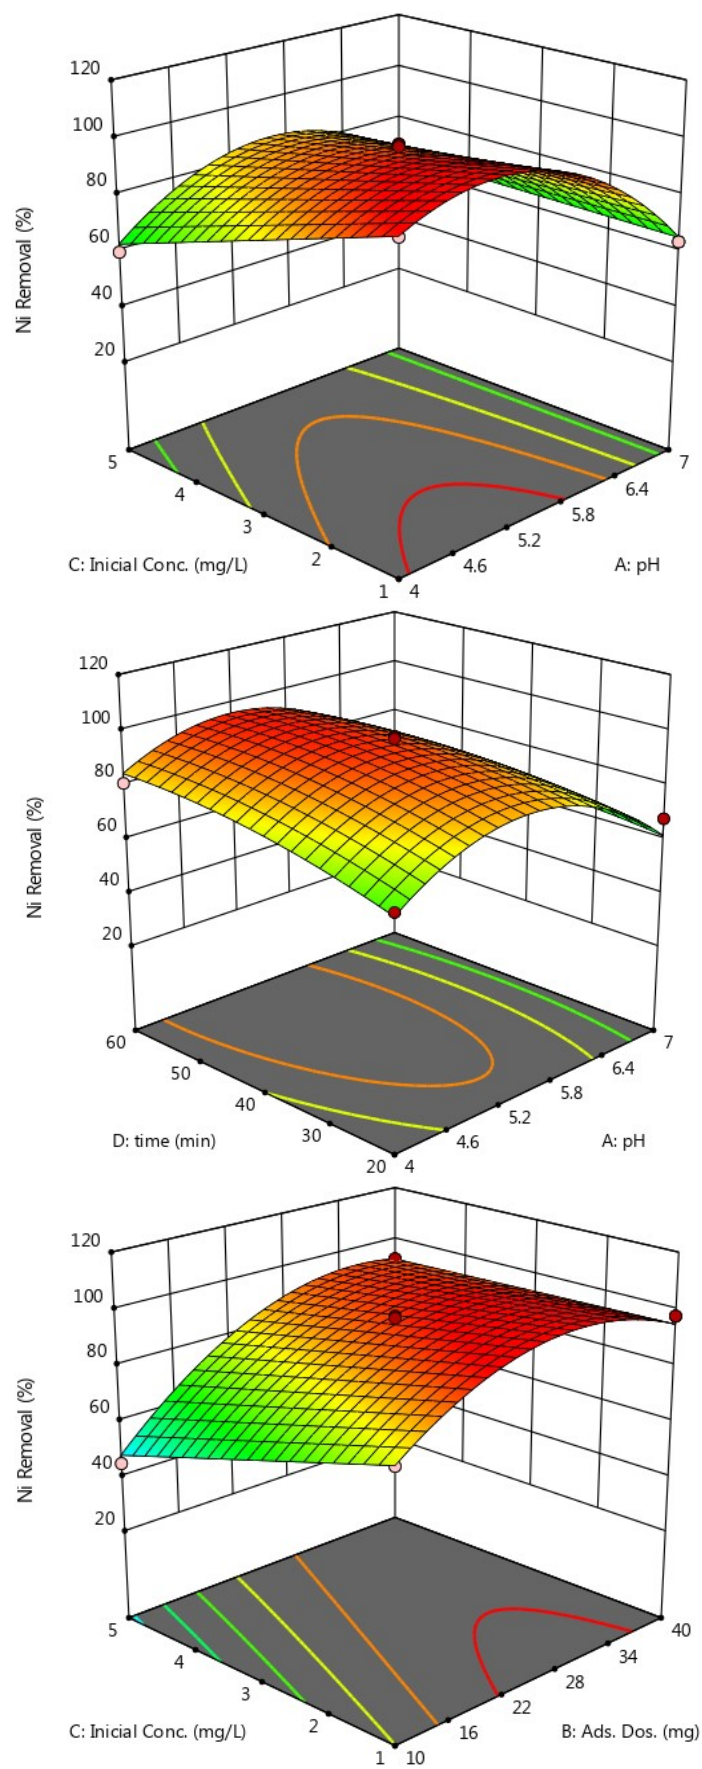

**Fig. S3.** 3D response surface plots of Ni(II) adsorption on COF@SO<sub>3</sub>H adsorbent.

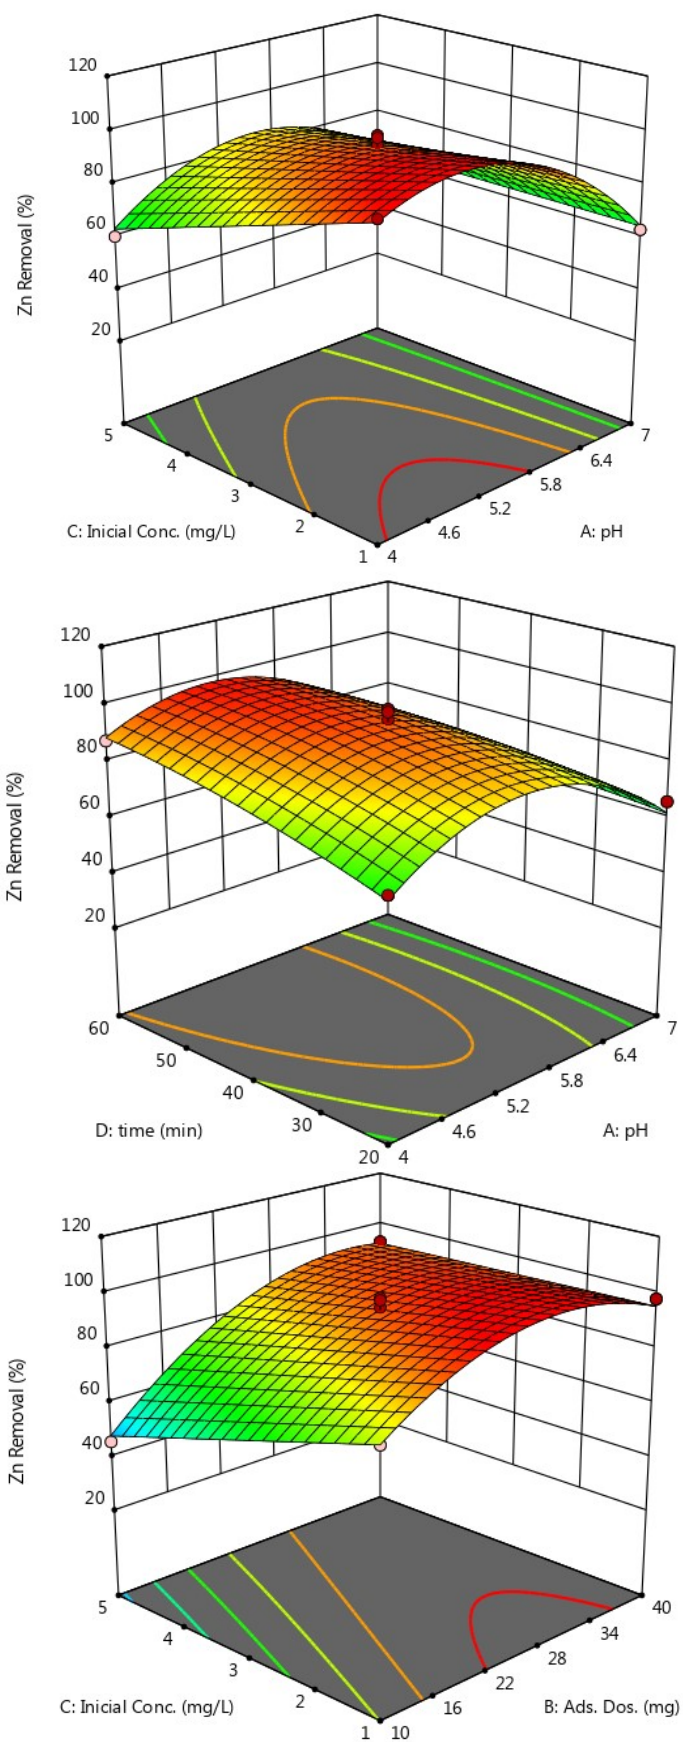

**Fig. S4.** 3D response surface plots of Zn(II) adsorption on COF@SO<sub>3</sub>H adsorbent.

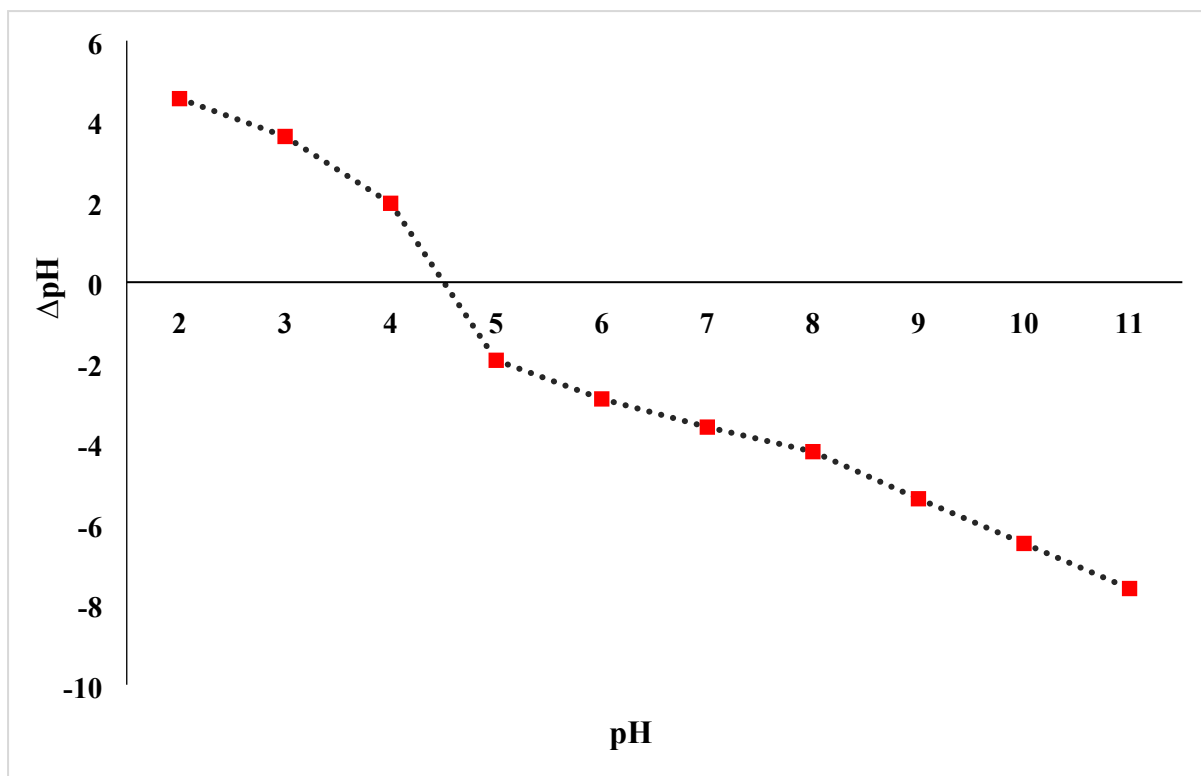

**Fig. S5.** Point Zero Charge (pHpzc) for COF@SO<sub>3</sub>H adsorbent.



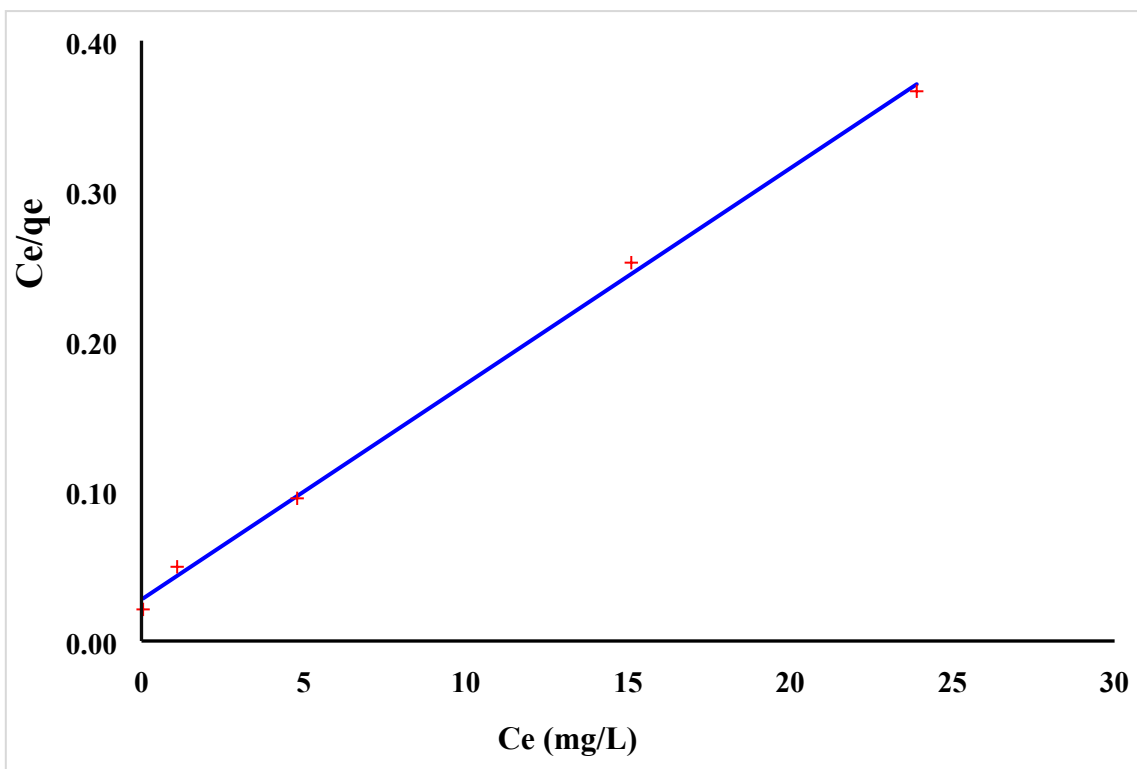

Fig. S6. Langmuir isotherm plot for Cd(II) removal by COF@SO<sub>3</sub>H at 25 °C with pH of 5.5.

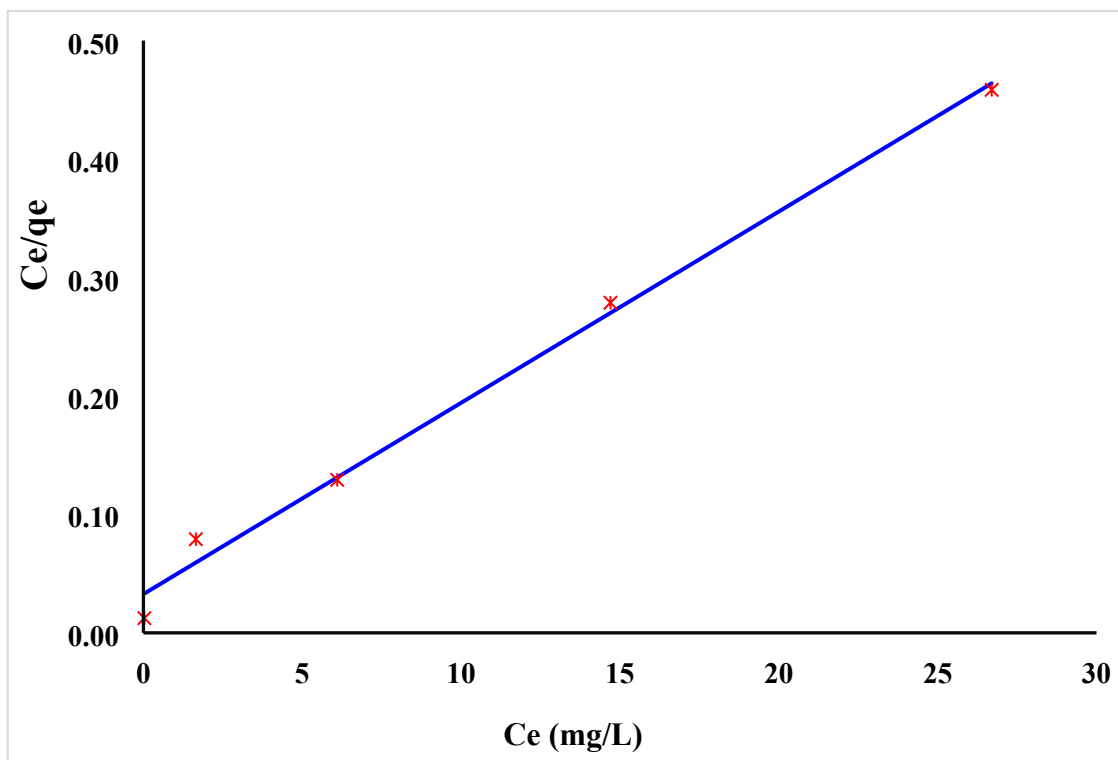

Fig. S7. Langmuir isotherm plot for Cu(II) removal by COF@SO<sub>3</sub>H at 25 °C with pH of 5.5.



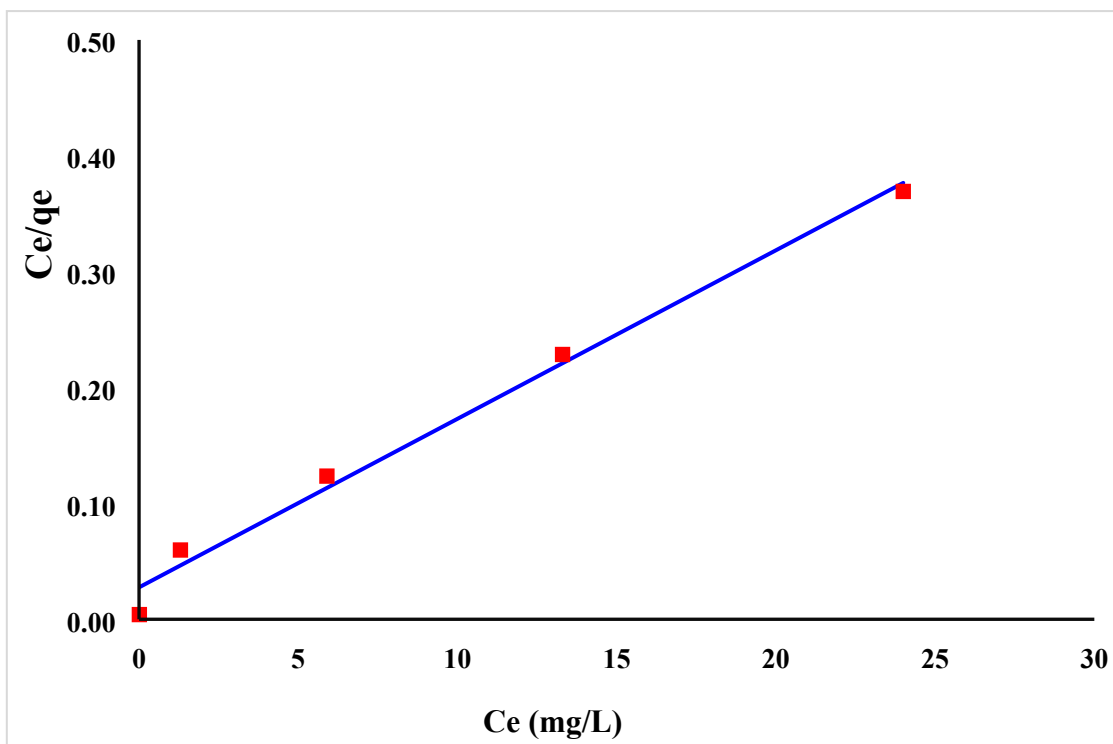

**Fig. S8.** Langmuir isotherm plot for Pb(II) removal by COF@SO<sub>3</sub>H at 25 °C with pH of 5.5.

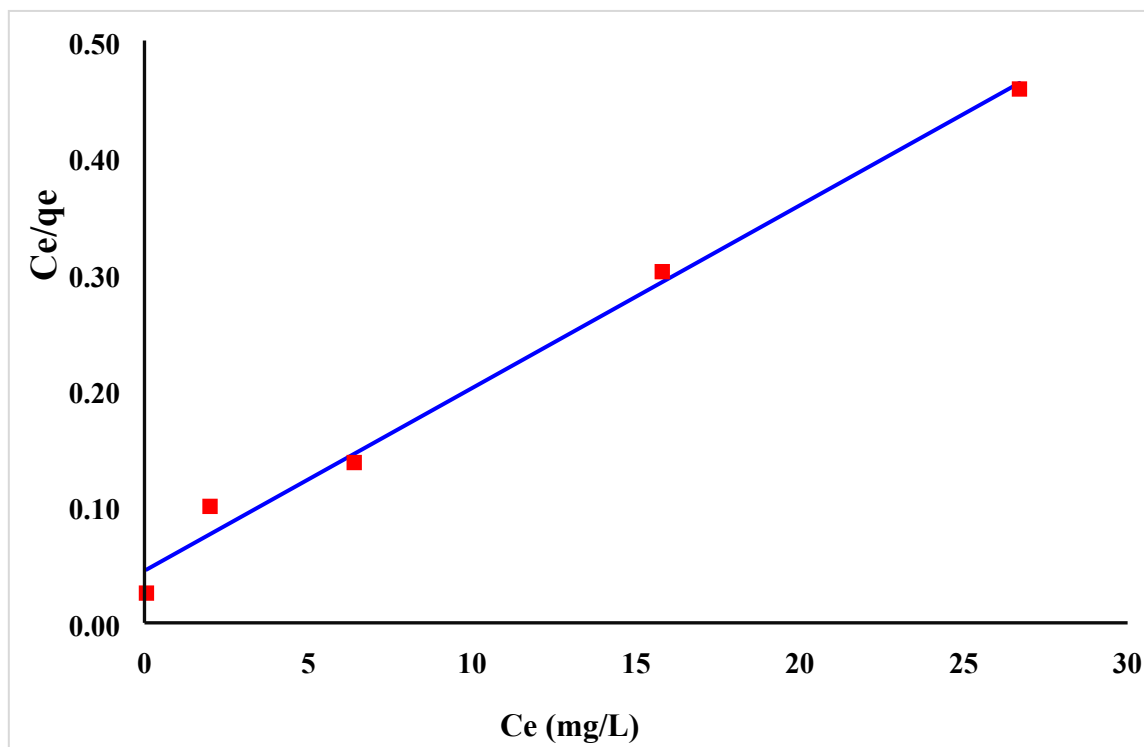

**Fig. S9.** Langmuir isotherm plot for Ni(II) removal by COF@SO<sub>3</sub>H at 25 °C with pH of 5.5.

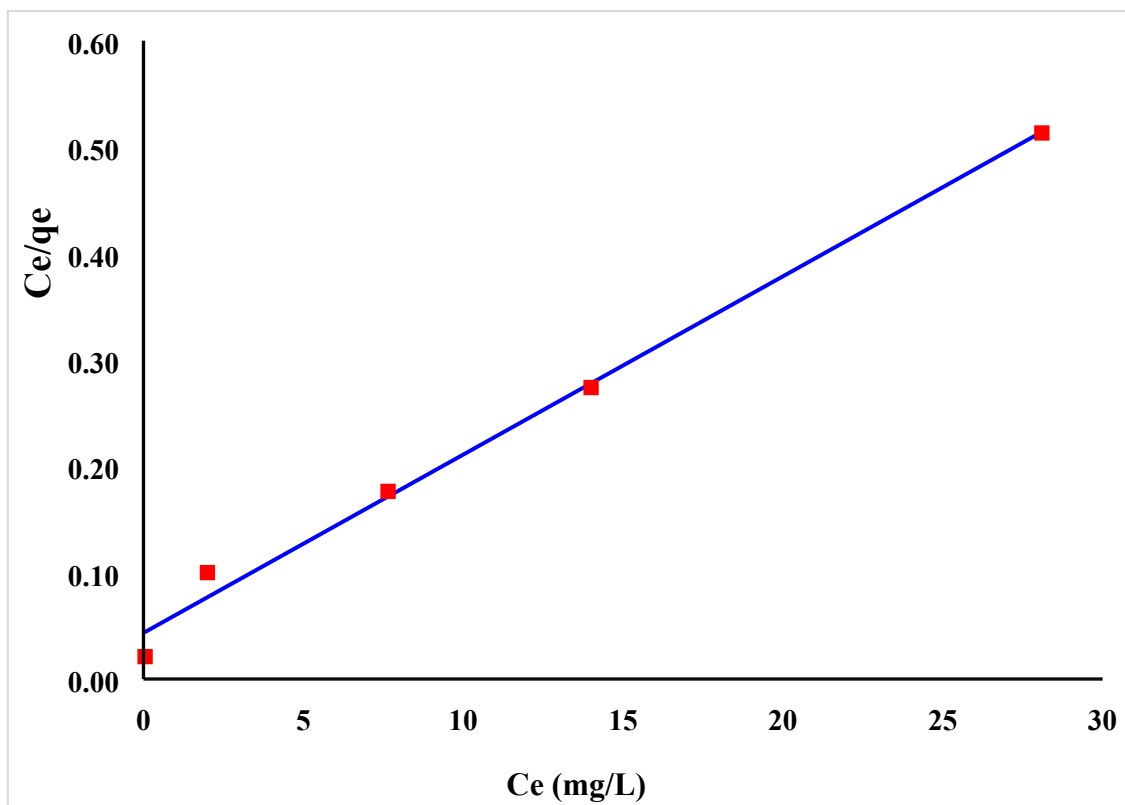

**Fig. S10.** Langmuir isotherm plot for Zn(II) removal by COF@SO<sub>3</sub>H at 25 °C with pH of 5.5.

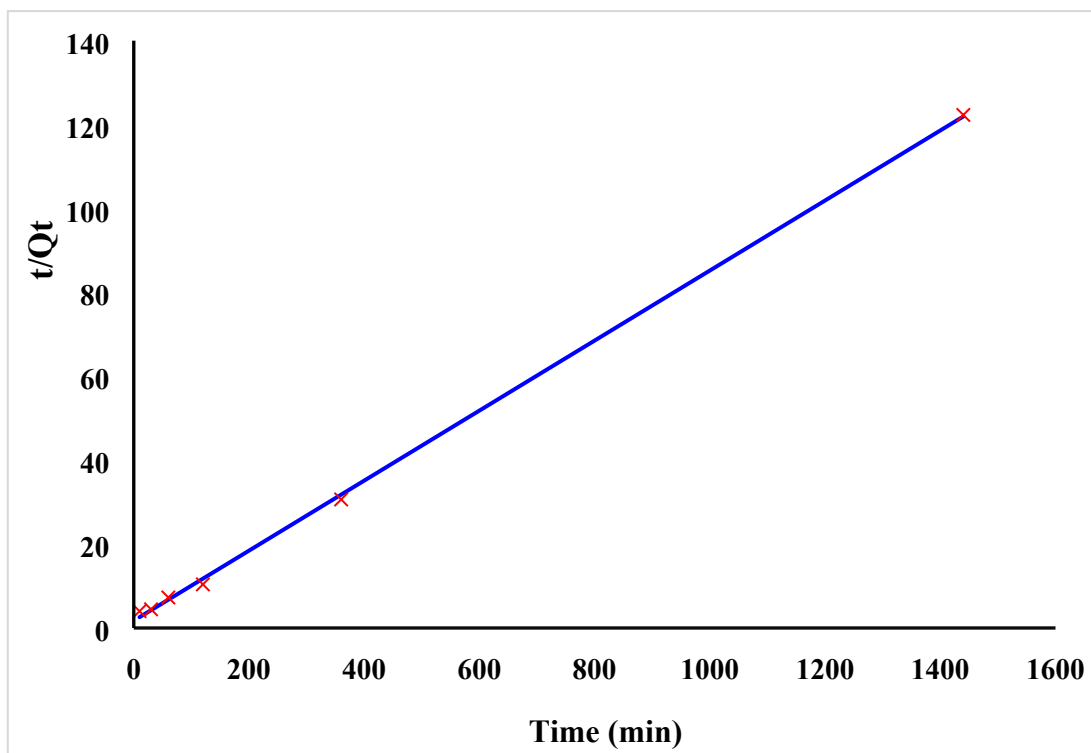

Fig. S11. Kinetic model of Cd(II) ions adsorption onto the COF@SO<sub>3</sub>H adsorbent using pseudo-2<sup>nd</sup>-order.

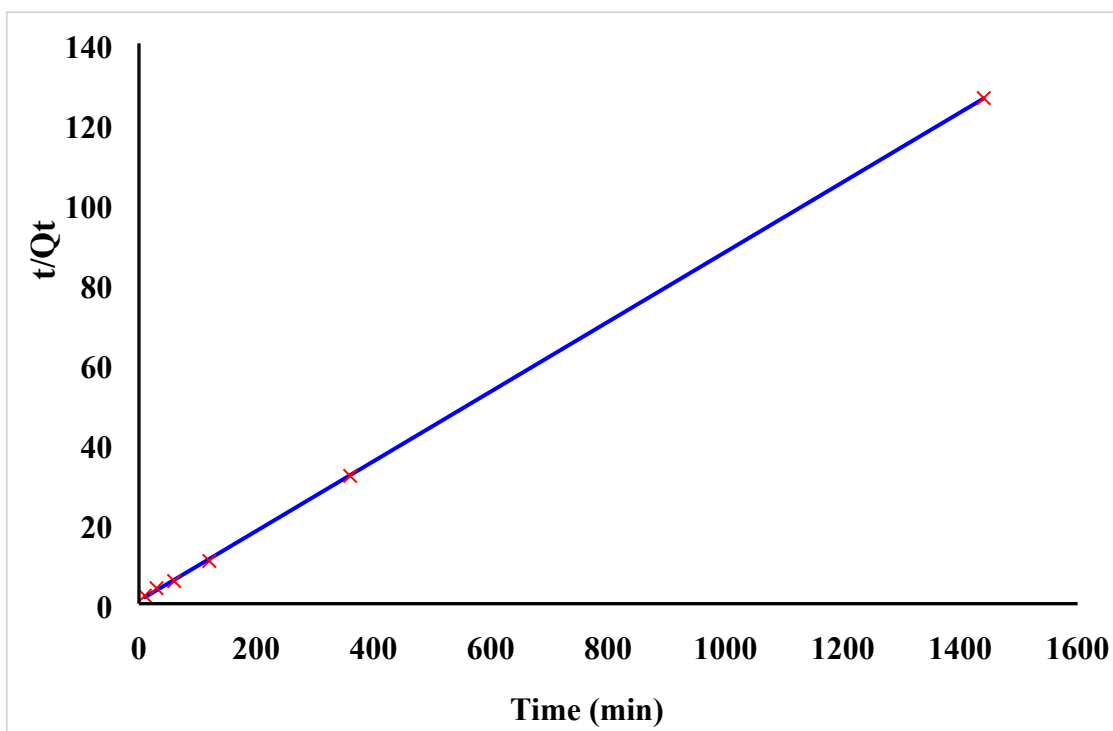

Fig. S12. Kinetic model of Cu(II) ions adsorption onto the COF@SO<sub>3</sub>H adsorbent using pseudo-2<sup>nd</sup>-order.

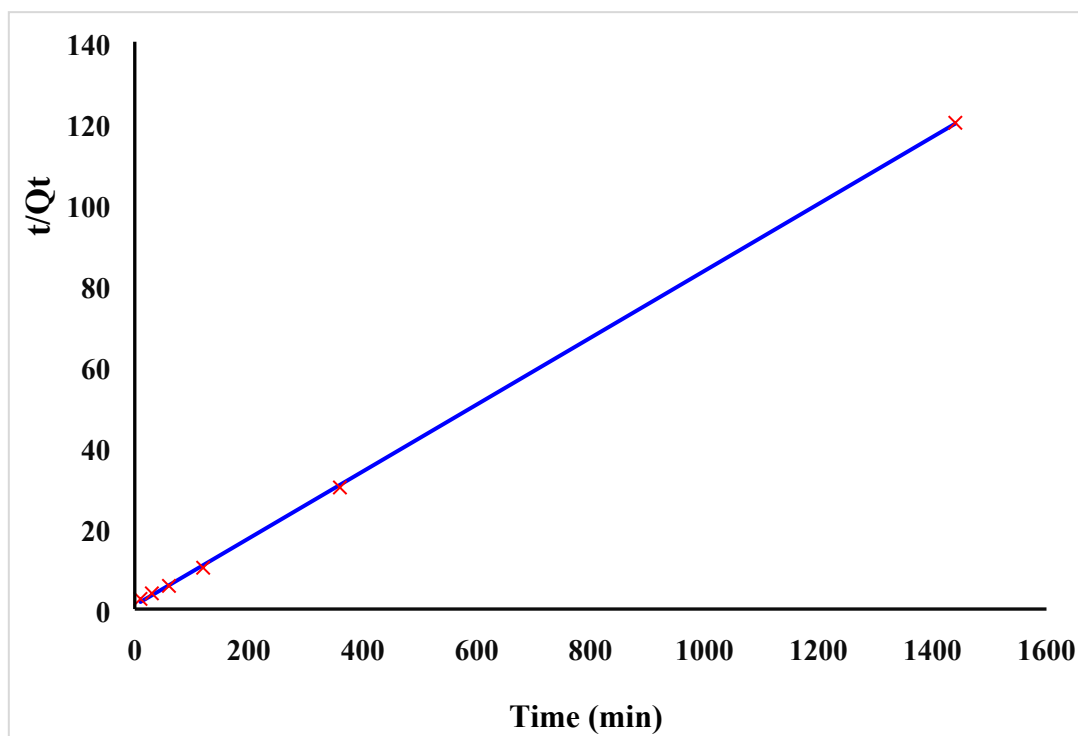

**Fig. S13.** Kinetic model of Pb(II) ions adsorption onto the COF@SO<sub>3</sub>H adsorbent using pseudo-2<sup>nd</sup>-order.

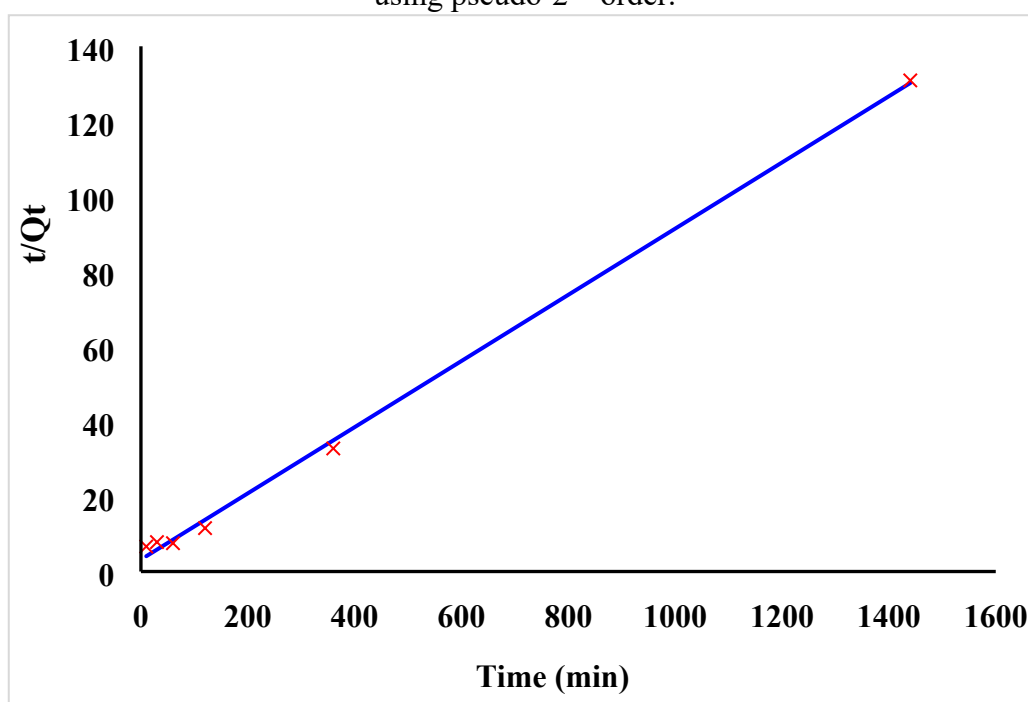

**Fig. S14.** Kinetic model of Ni(II) ions adsorption onto the COF@SO<sub>3</sub>H adsorbent using pseudo-2<sup>nd</sup>-order.

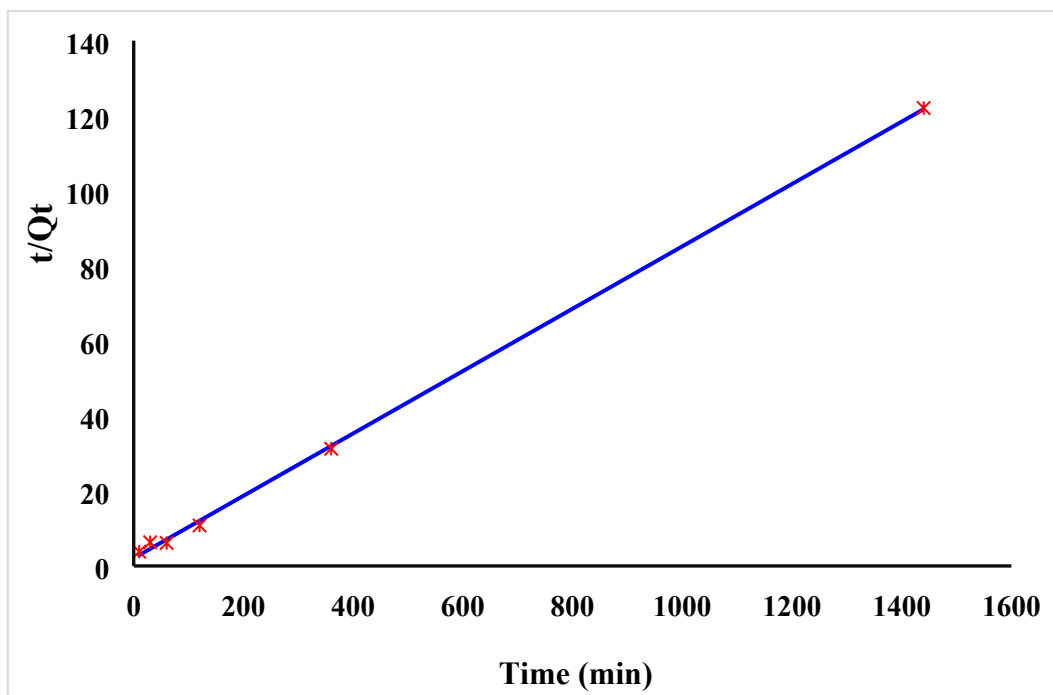

**Fig. S15.** Kinetic model of Zn(II) ions adsorption onto the COF@SO<sub>3</sub>H adsorbent using pseudo-2<sup>nd</sup>-order.

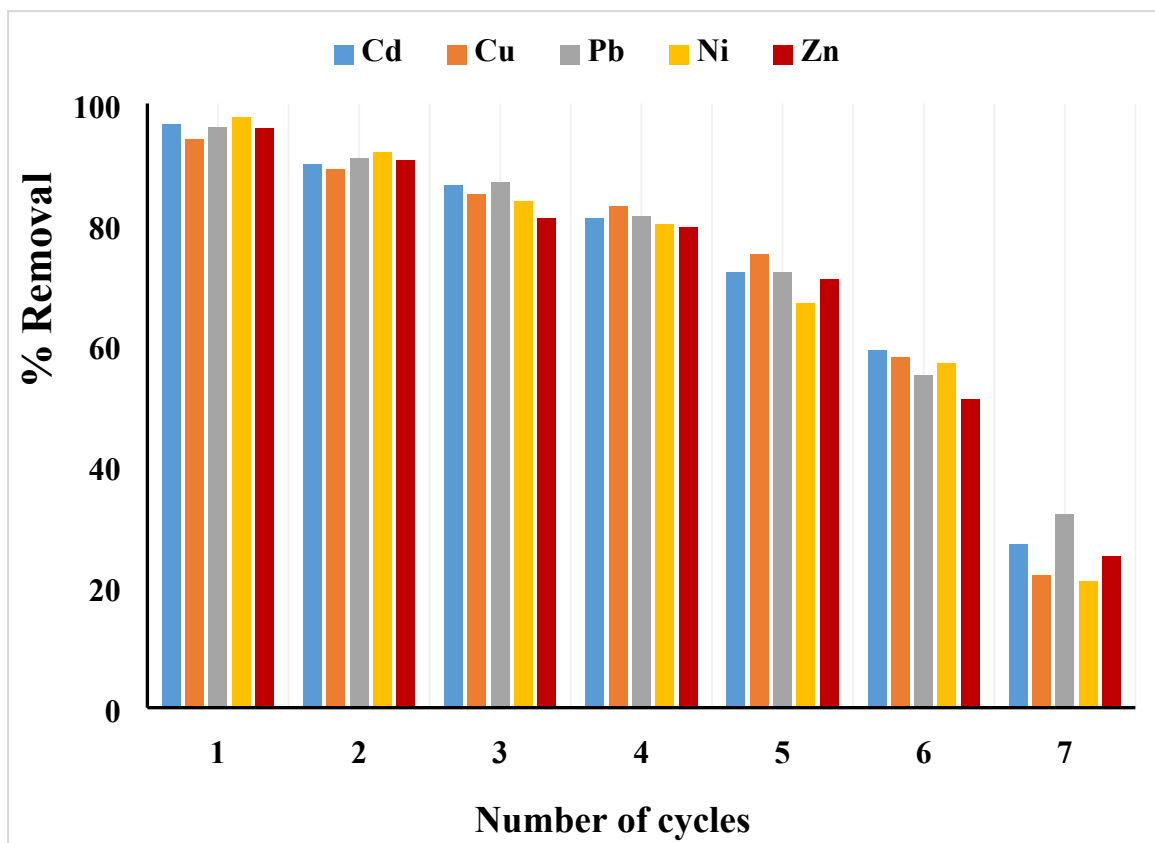

**Fig. S16.** Reusability study of COF@SO<sub>3</sub>H adsorbent at different adsorption-desorption cycles.

1. Dehghani, M. H. *et al.* Statistical modelling of endocrine disrupting compounds adsorption onto activated carbon prepared from wood using CCD-RSM and DE hybrid evolutionary optimization framework: Comparison of linear vs non-linear isotherm and kinetic parameters. *Journal of Molecular Liquids* **302**, 112526, doi:https://doi.org/10.1016/j.molliq.2020.112526 (2020).
2. Bahrami, M., Amiri, M. J. & Bagheri, F. Optimization of the lead removal from aqueous solution using two starch based adsorbents: Design of experiments using response surface methodology (RSM). *Journal of Environmental Chemical Engineering* **7**, 102793, doi:https://doi.org/10.1016/j.jece.2018.11.038 (2019).
3. Arabkhani, P., Javadian, H., Asfaram, A. & Hosseini, S. N. A reusable mesoporous adsorbent for efficient treatment of hazardous triphenylmethane dye wastewater: RSM-CCD optimization and rapid microwave-assisted regeneration. *Scientific Reports* **11**, 22751, doi:10.1038/s41598-021-02213-2 (2021).
4. Hu, Q., & Zhang, Z. Application of Dubinin-Radushkevich isotherm model at the solid/solution interface: A theoretical analysis. *Journal of Molecular Liquids*, **277**, 646-648. (2019).
5. Ayawei, N., Ebelegi, A.N. & Wankasi, D., 2017. Modelling and interpretation of adsorption isotherms. *Journal of chemistry* (2017).
6. Tamoradi Babaei, Z., Larki, A. & Ghanemi, K. Application of molybdenum disulfide nanosheets adsorbent for simultaneous preconcentration and determination of Cd(II), Pb(II), Zn(II) and Ni(II) in water samples. *Journal of the Iranian Chemical Society*, doi:10.1007/s13738-021-02289-7 (2021).
7. Javinezhad, S., Larki, A., Nikpour, Y. & Saghanzhad, S. J. Study on the Application of Cucurbit[6]uril as a Nanoporous Adsorbent for the Removal of 2,4-Dinitrophenol from Wastewaters *Analytical and Bioanalytical Chemistry Research* **5**, 217-228, doi:10.22036/abcr.2018.113797.1180 (2018).
8. Hasani, N., Selimi, T., Mele, A., Thaçi, V., Halili, J., Berisha, A. & Sadiku, M. 2022. Theoretical, equilibrium, kinetics and thermodynamic investigations of methylene blue adsorption onto lignite coal. *Molecules*, **27**(6), p.1856.
